# Supplementary material for: Associated Determinants of Surface Urban Heat Islands across 1449 Cities in China
Source: Hindawi journal article supplement (doi:10.1155/2019/4892714), 2019-07-21
Supplement: f1 [file 4892714.f1.docx]

**Supporting Information for**

**Associated Determinants of Surface Urban Heat Islands across 1449 Cities in China**

Yuanzheng Li,1,2,3 Lan Wang,4 Min Liu,1,3 Guosong Zhao,5 Tian He,6 and Qizheng Mao,6

1 School of Resources and Environment, Henan University of Economics and Law, Zhengzhou 450046, China.

2 Academician Laboratory for Urban and Rural Spatial Data Mining of Henan Province, Henan University of Economics and Law, Zhengzhou 450046, China.

3 State Key Laboratory of Urban and Regional Ecology, Research Center for Eco-Environmental Sciences, Chinese Academy of Sciences, Beijing 100085, China.

4 Key Laboratory of Urban Environment and Health, Institute of Urban Environment, Chinese Academy of Sciences, Xiamen 361021, China.

5 Key Laboratory of Land Surface Pattern and Simulation, Institute of Geographic Sciences and Natural Resources Research, Chinese Academy of Sciences, Beijing 100101.

6 School of Water Conservancy and Environment, Zhengzhou University, Zhengzhou 450001.

Correspondence should be addressed to Lan Wang, wlsunshinelz@163.com; or Guosong Zhao, zhaogs86@126.com.

**Supporting Texts S1 Introduction of the** **land use data**

The land use with 1 km resolution in 2010 was produced based on the National Land Cover/Use Dataset of China that was primarily produced from the interpretation of Landsat TM/ETM+ images ([Liu et al. 2014](#_ENREF_3)). Their classification schemes include six first-level land use types: cropland, woodland, grassland, waterbody, built-up land, and unused land ([Zhang et al. 2014](#_ENREF_6); [Liu et al. 2005](#_ENREF_2)). In addition, there are 25 second-level land use types in these two data sets. For instance, the built-up land can be furtherly divided into three types, including urban land, rural settlements, and other construction land. Their overall accuracy of classification is more than 91.2% for each land use type ([Zhang et al. 2014](#_ENREF_6); [Liu et al. 2014](#_ENREF_3)).

**Supporting Texts S2 Introduction of the** **impervious percentage data**

The impervious percentage data with 500 m in 2010 was derived by regression method, based on the normalized urban areas composite index (NUACI) ([Liu et al. 2015](#_ENREF_4)). The NUACI was produced by nighttime light intensity, enhanced vegetation index and normalized difference water index ([Liu et al. 2015](#_ENREF_4)). The accuracy of impervious percentage data is high (R2 = 0.8079, R = 0.8908, RMSE = 0.1176), having referring to the extracted impervious data by the maximum likelihood method using the data obtained by Enhanced Thematic Mapper (ETM+) in Landsat satellites ([Liu et al. 2015](#_ENREF_4)).

**Supporting Texts S3 Introduction of the** **temperature and precipitation data**

Both the temperature and precipitation data were produced by spatial interpolation method using the monthly observed records of stations in national level, including the elemental, fiducial and ordinary stations, and digital elevation model data in 0.5° × 0.5° resolution, derived by resampling the global 30 arc-second elevation data in 0.05° × 0.05° resolution. The adopted softewore was AUSPLIN that was the widely approved best interpeolation platform for climate data ([Hutchinson and Xu 2004](#_ENREF_1); [Liu et al. 2008](#_ENREF_5)).

**Supporting Texts S4 Comparison of four intelligence algorithms for prediction of SUHII**

Four intelligence algorithms were adopted, including the general regression neural network (GRNN), support vector machine based on genetic algorithm (SVM_GA), particle swarm optimization (SVM_PSO), and grid search method (SVM_GS). The proportion was set as 4:1 for the training and testing samples. Both operations of the parameter optimization and prediction using these four algorithms were repeated in 49 times in order to avoid the uncertain during the process and obtain stable results.

No significant differences of prediction accuracies were found among them by using the driving indices that were significant partial correlated with the corresponding SUHII in national scale (Table S1). Nevertheless, the SVM_GA method was thought to be the best and chosen here for its least human intervention, smaller variable coefficient, lesser time cost, stricter mathematical foundation, better fitness for the regression by small sample, etc.

**Supporting Texts S5 Comparison of three types of indices for simulation of SUHII**

Three types of indices were adopted, including adopting the driving indices that were significantly partially or normal correlated with the SUHII, and using all indices. No significant differences of simulation accuracies were found among them by using the SVM_GA method in national scale (Table S1). Nevertheless, the driving indices that were significantly partially correlated with SUHII were thought to be the best and chosen here for its least variable numbers and smallest variable coefficients.

# References

Hutchinson, Michael F, and Tingbao Xu. 2004. "Anusplin version 4.2 user guide." Centre for Resource and Environmental Studies, The Australian National University, Canberra.

Liu, Jiyuan, Mingliang Liu, Hanqin Tian, Dafang Zhuang, Zengxiang Zhang, Wen Zhang, Xianming Tang, and Xiangzheng Deng. 2005. "Spatial and temporal patterns of China's cropland during 1990–2000: An analysis based on Landsat TM data." Remote Sensing of Environment 98 (4):442-56.

Liu, Jiyuan;, Wenhui; Kuang, Zengxiang; Zhang, Xinliang; Xu, Yuanwei; Qin, Jia; Ning, Wancun; Zhou, et al. 2014. "Spatiotemporal characteristics, patterns, and causes of land-use changes in China since the late 1980s." Journal of Geographical Sciences 24 (2):195-210. doi: 10.1007/s11442-014-1082-6.

Liu, Xiaoping, Guohua Hu, Bin Ai, Xia Li, and Qian Shi. 2015. "A normalized urban areas composite index (NUACI) based on combination of DMSP-OLS and MODIS for mapping impervious surface area." Remote Sensing 7 (12):17168-89.

Liu, Zhihong, Lingtao Li, R McVicar Tim, T.G Van Niel, Qinke Yang, and Rui Li. 2008. "Introduction of the professional interpolation software for meteorology data: Anusplinn." Meteorological Monthly 34 (2):92-100.

Zhang, Zengxiang, Xiao Wang, Xiaoli Zhao, Bin Liu, Lin Yi, Lijun Zuo, Qingke Wen, Fang Liu, Jinyong Xu, and Shunguang Hu. 2014. "A 2010 update of National Land Use/Cover Database of China at 1:100000 scale using medium spatial resolution satellite images." Remote Sensing of Environment 149:142-54.

# Supporting table

Table S1. Accuracy statistics derived from the adoption of different indices and intelligence algorithms for daytime and nighttime SUHII simulation in each region of China during the whole year and each season. (Unit of RMSE: °C)

| Time slot | | GRNN_P | | SVM_GA_P | | SVM_PSO_P | | SVM_GS_P | | SVM_GA_C | | SVM_GE_A | | |
| --- | --- | --- | --- | --- | --- | --- | --- | --- | --- | --- | --- | --- | --- | --- |
| RMSE | R | RMSE | R | RMSE | R | RMSE | R | RMSE | R | RMSE | R |
| Whole year | D | 1.10 | 0.59 | 1.08 | 0.60 | 1.06 | 0.60 | 1.06 | 0.60 | 0.75 | 0.63 | 0.84 | 0.53 |
|  | N | 0.49 | 0.71 | 0.51 | 0.70 | 0.51 | 0.70 | 0.50 | 0.71 | 0.46 | 0.69 | 0.44 | 0.75 |
| Winter | D | 1.30 | 0.56 | 1.29 | 0.58 | 1.29 | 0.58 | 1.28 | 0.59 | 1.09 | 0.67 | 1.07 | 0.59 |
|  | N | 0.84 | 0.62 | 0.83 | 0.63 | 0.84 | 0.62 | 0.84 | 0.62 | 0.68 | 0.67 | 0.63 | 0.61 |
| Spring | D | 1.41 | 0.64 | 1.44 | 0.63 | 1.44 | 0.62 | 1.44 | 0.62 | 1.50 | 0.57 | 1.25 | 0.69 |
|  | N | 0.58 | 0.66 | 0.54 | 0.71 | 0.56 | 0.68 | 0.54 | 0.71 | 0.55 | 0.72 | 0.50 | 0.81 |
| Summer | D | 1.54 | 0.55 | 1.51 | 0.56 | 1.52 | 0.56 | 1.52 | 0.56 | 1.50 | 0.67 | 1.38 | 0.60 |
|  | N | 0.62 | 0.63 | 0.64 | 0.61 | 0.62 | 0.63 | 0.61 | 0.63 | 0.52 | 0.71 | 0.52 | 0.68 |
| Autumn | D | 0.95 | 0.69 | 0.95 | 0.68 | 0.95 | 0.68 | 0.96 | 0.67 | 0.92 | 0.74 | 0.96 | 0.69 |
|  | N | 0.63 | 0.63 | 0.58 | 0.70 | 0.58 | 0.70 | 0.58 | 0.71 | 0.60 | 0.66 | 0.58 | 0.65 |
| CV |  | 0.39 |  | 0.40 |  | 0.40 |  | 0.41 |  | 0.44 |  | 0.40 |  |

Notes: D & N represents during daytime and nighttime, respectively; GRNN_P, SVM_GA_P,SVM_PSO_P and SVM_GS_P represents adopting the driving indices that having significant partial correlation coefficients with the corresponding SUHI by the General Regression Neural Network, Support Vector Machine Based on Genetic Algorithm, Particle Swarm Optimization and Grid Search method; SVM_GA_C and SVM_GE_A represents adopting the driving indices that having significant correlation coefficients and all driving indices by the Support Vector Machine Based on Genetic Algorithm. D and N represents day and night, respectively. CV refers to the coefficient of variation. All correlation coefficients are significant at the 0.01 level.
